# Supplementary material for: Investigating Carnivore Guild Structure: Spatial and Temporal Relationships amongst Threatened Felids in Myanmar
Source: MDPI journal article supplement (doi:10.3390/ijgi10120808), 2021-11-30
Supplement: s1 [file s1]

## Supplementary Materials

### Investigating Carnivore Guild Structure: Spatial and Temporal Relationships amongst Threatened Felids in Myanmar

Pyae Phyo Kyaw<sup>1,2\*</sup>, David W. Macdonald<sup>1\*</sup>, Ugyen Penjor<sup>1,3</sup>, Saw Htun<sup>2</sup>, Hla Naing<sup>2</sup>, Dawn Burnham<sup>1</sup>, Zsaneta M. Kaszta<sup>1</sup>, Samuel A. Cushman<sup>1,4</sup>

\*Correspondence: pyaephyoekyawwcs@gmail.com

ISPRS International Journal of Geo-Information

**Table S1.** Survey information and camera trap locations used for space use analysis in Htamanthi Wildlife Sanctuary during 2014-2018.

| Survey Periods                             | 2014-15         | 2015-16         |             | 2016-17                              |             | 2017-2018       |                           |
|--------------------------------------------|-----------------|-----------------|-------------|--------------------------------------|-------------|-----------------|---------------------------|
| Survey Name                                | WildCRU1        | WildCRU2        | IUCN1       | Sun Bear                             | IUCN2       | WildCRU3        | IUCN3                     |
| Survey Area                                | Nam Pa Gon      | Nam E Zu        | Nam Yan Yin | Nam E Zu                             | Nam Yan Yin | Nam Pa Gon      | Nam Phi Lin & Nam Yan Yin |
| Target Species                             | Clouded Leopard | Clouded Leopard | Tiger       | Malayan Sun Bear                     | Tiger       | Clouded Leopard | Tiger                     |
| Spacing (km)                               | 1-1.5           | 1-1.5           | 2-3         | 1 station per 2 km <sup>2</sup> grid | 2-3         | 1-1.5 km        | 2-3                       |
| No. Days Operational                       | 14452           | 14116           | 3151        | 2682                                 | 6238        | 15868           | 7613                      |
| Total Trap Days                            | 7226            | 7226            | 1632        | 2682                                 | 3155        | 7934            | 3855                      |
| No. Trap Locations                         | 82              | 80              | 50          | 60                                   | 75          | 80              | 100                       |
| No. Trap Locations (Working)               | 80              | 79              | 46          | 60                                   | 73          | 80              | 99                        |
| Trap Locations used for Space use analysis | -               | 79              | -           | 60                                   | 33          | 80              | 36                        |

## Method S1

### Single-species occupancy modeling and covariate selection

#### Covariates

In our analysis, we considered a simple set of covariates that are ecologically informative and have been found to be important to those species. Thus, seven environmental and anthropogenic covariates are selected: (1) elevation, (2) terrain ruggedness, (3) density of small streams and main rivers within a radius of 2 km of camera stations, (4) distance to main stream which are used by trespassing boats, (5) per cent tree cover, (6) Euclidean distance to park boundary, and (7) disturbance expressed as the number of poaching detections, trespassing and livestock trafficking activities recorded by each camera trap station, which was standardized by total trap nights across all surveys. The elevation raster layer (30-meter resolution) was obtained from the LOCA website, an online platform for updated GIS information for the WCS Myanmar program (available at <https://myanmar-geotools.appspot.com>), and based on this raster we calculated terrain ruggedness. For forest cover, we used Hansen global forest cover layer for the year 2000 as the base of analysis [1]. Then, the corresponding year data were obtained by calculating forest cover using forest gain and loss for respective years from 2014 to 2016. The analysis is of focal mean values of forest which does not use a threshold for defining forest and non-forest. The mean values of tree cover percentage, elevation, and stream density were extracted from 2km focal mean representing average site characteristics around each camera station, using zonal statistics in SAGA plug-in in QGIS software [2]. The digitized park boundary and stream data were obtained from the WCS Myanmar GIS team. The Euclidean distance to park boundary and streams was calculated in QGIS. We then extracted the values of each covariate at each camera trap location and calculated Pearson correlations between the covariates (Figure S1). We assumed the correlation was strong if  $|r| > 0.7$ . Since the variation in sampling duration across different surveys can affect detection probability, we included survey effort as an observation level covariate.

#### Space use estimation

We binned the daily detection histories into 10 days per sampling occasion to increase temporal independence and reduce over-dispersion of data [3]. Our sampling effort ranged from 29 to 109 days among survey grids, and to maximize accuracy and precision of occupancy estimation we set sampling occasions at 10 days, thus resulting in at least three occasions for each grid [4].

To estimate the probability of space use for each species independently, we ran separate occupancy models using our predetermined covariates for each species. Firstly, we checked the importance of effort to detection probability. Using AIC ranking, we chose model with effort when they are in top model or when there is low variation in model performance (i.e.  $\Delta AIC < 2$ ). Then, using non-correlated site covariates we created a global model and checked the model fitness by bootstrapping with 10,000 samples as suggested by MacKenzie & Bailey (2004). We used the “dredge” function from package “MuMIn” [6], which runs models for all combinations of the predictor variables. We then selected all covariates present in the best ranked models (i.e. models with the  $\Delta AICc$  and  $QAIC < 2$  [7]). The model averaging was done for best ranked models and beta parameter estimates and confidence intervals are obtained (Table 1). We also extracted overall predictions for occupancy and detection probability for each

species using respective pairs of covariates used during model averaging. The analysis was conducted in R [8] using package “unmarked” [9].

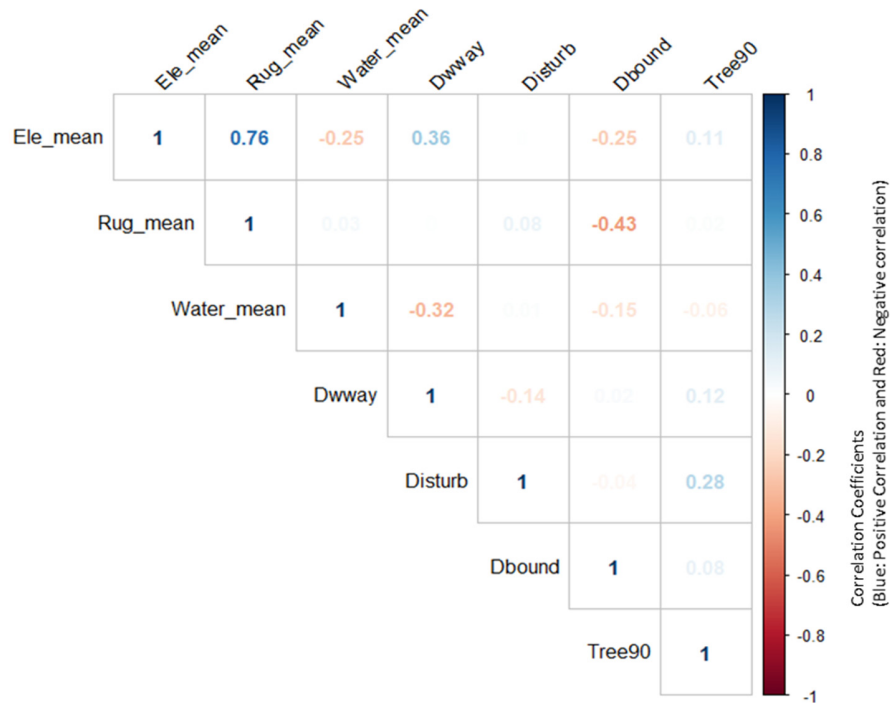

**Figure S1.** Correlation test of covariates affecting occupancy of four cat species for single-species single-season occupancy modelling where Ele\_mean= Mean elevation, Rug\_mean= mean terrain ruggedness, Water\_mean=Mean water density, Dwway= Distance to accessible streams, Dbound=Distance to nearest park boundary, Disturb=Frequency of human and livestock detected by camera traps, Tree90=Percent tree cover with 90% threshold

**Table S2.** Beta parameter estimates for occupancy ( $\Psi$ ), detection probability ( $P$ ) and Standard errors (SE) from model averaging results for each felids species

|        | Model averaged Beta Parameter | Estimate | SE    |
|--------|-------------------------------|----------|-------|
| $\Psi$ | Intercept                     | -1.358   | 0.469 |
|        | Distance to Boundary          | 0.325    | 0.402 |
|        | Disturbance                   | 1.802    | 0.919 |
|        | Mean Elevation                | 1.137    | 0.485 |
|        | Tree cover                    | -0.423   | 0.456 |
| $P$    | Intercept                     | -2.519   | 0.431 |
|        | Effort                        | -0.005   | 0.037 |
| $\Psi$ | Intercept                     | 0.817    | 0.509 |
|        | Disturbance                   | 2.633    | 1.437 |
|        | Stream density                | 0.033    | 0.112 |
|        | Tree cover                    | 0.029    | 0.111 |
|        | Mean Elevation                | 0.082    | 0.303 |
|        | Distance to main streams      | -0.147   | 0.199 |
|        | Distance to boundary          | -0.075   | 0.199 |
| $P$    | Intercept                     | -2.884   | 0.663 |
|        | Effort                        | 0.104    | 0.067 |
| $\Psi$ | Intercept                     | -0.154   | 0.277 |
|        | Disturbance                   | 1.277    | 0.91  |
|        | Stream density                | 0.003    | 0.055 |
|        | Tree cover                    | 0.105    | 0.244 |
|        | Mean Elevation                | 0.108    | 0.347 |
|        | Distance to main streams      | 0.034    | 0.115 |
|        | Distance to boundary          | 0.031    | 0.109 |
| $P$    | Intercept                     | -2.887   | 0.767 |
|        | Effort                        | 0.116    | 0.077 |
| $\Psi$ | Intercept                     | -0.741   | 0.250 |
|        | Disturbance                   | 0.029    | 0.099 |
|        | Stream density                | 0.025    | 0.098 |
|        | Tree cover                    | 0.036    | 0.119 |
|        | Mean Elevation                | 0.040    | 0.153 |
|        | Distance to main streams      | 0.011    | 0.073 |
|        | Distance to boundary          | -0.019   | 0.086 |
| $P$    | Intercept                     | -4.937   | 1.516 |
|        | Effort                        | 0.295    | 0.152 |
| $\Psi$ | Intercept                     | -0.768   | 0.158 |
|        | Disturbance                   | 0.066    | 0.164 |
|        | Stream density                | 0.027    | 0.093 |
|        | Tree cover                    | 0.095    | 0.214 |
|        | Mean Elevation                | 0.008    | 0.064 |
|        | Distance to main streams      | -0.001   | 0.046 |
|        | Distance to boundary          | 0.009    | 0.055 |
| $P$    | Intercept                     | -2.532   | 0.697 |
|        | Effort                        | 0.143    | 0.070 |

**Table S3.** Model selection for single-species occupancy modeling ranked by delta AICC < 2 and QAIC < 2 where EFF= Effort, Dbound= Distance to boundary, Disturb= Disturbance(the number of poaching detections, trespassing and livestock trafficking activities recorded by each camera trap station), Dwway = Distance to main streams, Ele\_mean = mean elevation, Tree90 = Tree cover, Water\_mean = Mean stream density. Tiger and

| Models                                      | P (Int) | Psi (Int) | P (EFF) | Psi (Dbound) | Psi (Disturb) | Psi (Dwway) | Psi (Ele_mean) | Psi (Tree90) | Psi (Water_mean) | R^2    | df | logLik   | AICc/QAIC | delta | Weight |
|---------------------------------------------|---------|-----------|---------|--------------|---------------|-------------|----------------|--------------|------------------|--------|----|----------|-----------|-------|--------|
| Tiger                                       |         |           |         |              |               |             |                |              |                  |        |    |          |           |       |        |
| Psi(Dbound+Disturb+Ele_mean+Tree90)         | -2.561  | -1.419    |         | 0.616        | 1.952         |             | 1.32           | -0.729       |                  | 0.131  | 6  | -160.126 | 332.6     | 0     | 0.314  |
| Psi( Disturb+Ele_mean+Tree90)               | -2.593  | -1.202    |         |              | 1.955         |             | 1.008          | -0.501       |                  | 0.122  | 5  | -161.559 | 333.3     | 0.78  | 0.213  |
| Psi(Disturb+Ele_mean)                       | -2.584  | -1.309    |         |              | 1.563         |             | 0.9278         |              |                  | 0.116  | 4  | -162.623 | 333.4     | 0.84  | 0.207  |
| Psi(Dbound+Disturb+Ele_mean)                | -2.557  | -1.462    |         | 0.3902       | 1.477         |             | 1.077          |              |                  | 0.12   | 5  | -161.936 | 334.1     | 1.53  | 0.146  |
| P(Eff), Psi(Dbound+Disturb+Ele_mean+Tree90) | -2.125  | -1.430    | -0.045  | 0.6209       | 1.945         |             | 1.322          | -0.7241      |                  | 0.131  | 7  | -160.025 | 334.5     | 1.90  | 0.121  |
| Clouded leopard                             |         |           |         |              |               |             |                |              |                  |        |    |          |           |       |        |
| P(Eff),Psi(Disturb)                         | -2.879  | 0.817     | 0.1034  |              | 2.681         |             |                |              |                  | 0.064  | 4  | -538.209 | 1084.6    | 0.00  | 0.291  |
| P(Eff),Psi(Disturb+Water_mean)              | -2.906  | 0.822     | 0.106   |              | 2.620         |             |                |              | 0.1991           | 0.067  | 5  | -537.735 | 1085.7    | 1.12  | 0.166  |
| P(Eff),Psi(Disturb+Tree90)                  | -2.842  | 0.729     | 0.1004  |              | 2.434         |             |                | 0.1951       |                  | 0.0665 | 5  | -537.823 | 1085.9    | 1.30  | 0.152  |
| P(Eff),Psi(Disturb+Ele_mean)                | -2.918  | 0.862     | 0.1059  |              | 2.582         |             | 0.5735         |              |                  | 0.0662 | 5  | -537.881 | 1086.0    | 1.42  | 0.144  |
| P(Eff),Psi(Disturb+Dwway)                   | -2.873  | 0.843     | 0.1029  |              | 2.769         | -0.1469     |                |              |                  | 0.0658 | 5  | -537.940 | 1086.1    | 1.53  | 0.135  |
| P(Eff),Psi(Dbound+Disturb)                  | -2.893  | 0.838     | 0.1046  | -0.07528     | 2.699         |             |                |              |                  | 0.0645 | 5  | -538.137 | 1086.5    | 1.93  | 0.111  |
| Asiatic golden cat                          |         |           |         |              |               |             |                |              |                  |        |    |          |           |       |        |
| P(Eff), Psi(Disturb)                        | -2.857  | -0.1123   | 0.1153  |              | 1.710         |             |                |              |                  | 0.1138 | 4  | -462.564 | 107.2     | 0.00  | 0.251  |
| P(Eff)                                      | -3.042  | -0.2015   | 0.1254  |              |               |             |                |              |                  | 0.0112 | 3  | -478.342 | 108.5     | 1.31  | 0.130  |
| P(Eff), Psi(Disturb+Dwway)                  | -2.863  | -0.1657   | 0.116   |              | 1.587         | 0.3149      |                |              |                  | 0.1231 | 5  | -461.051 | 108.9     | 1.68  | 0.108  |
| P(Eff), Psi(Disturb+Ele_mean)               | -2.957  | 0.0365    | 0.1215  |              | 1.802         |             | 1.005          |              |                  | 0.1230 | 5  | -461.068 | 108.9     | 1.69  | 0.108  |
| P(Eff), Psi(Dbound+Disturb)                 | -2.792  | -0.196    | 0.1098  | 0.296        | 1.638         |             |                |              |                  | 0.1214 | 5  | -461.330 | 108.9     | 1.74  | 0.105  |
| P(Eff), Psi(Disturb+Tree90)                 | -2.802  | -0.2171   | 0.1109  |              | 1.433         |             |                | 0.3146       |                  | 0.1212 | 5  | -461.359 | 108.9     | 1.75  | 0.105  |
| P(Eff), Psi(Tree90)                         | -2.918  | -0.3184   | 0.1148  |              |               |             |                | 0.7175       |                  | 0.0583 | 4  | -471.310 | 109.0     | 1.84  | 0.100  |
| P(Eff), Psi(Disturb+Water_mean)             | -2.863  | -0.1080   | 0.1158  |              | 1.715         |             |                |              | 0.0283           | 0.1139 | 5  | -462.552 | 109.2     | 2.00  | 0.092  |
| Marbled cat                                 |         |           |         |              |               |             |                |              |                  |        |    |          |           |       |        |
| P(Eff)                                      | -4.942  | -0.7448   | 0.2956  |              |               |             |                |              |                  | 0.0241 | 3  | -305.609 | 59.5      | 0.00  | 0.299  |
| P(Eff),Psi(Tree90)                          | -4.854  | -0.8330   | 0.2889  |              |               |             |                | 0.2999       |                  | 0.0321 | 4  | -304.431 | 61.3      | 1.80  | 0.121  |
| P(Eff),Psi(Disturb)                         | -0.889  | -0.7878   | 0.2910  |              | 0.2412        |             |                |              |                  | 0.0313 | 4  | -304.548 | 61.3      | 1.82  | 0.120  |
| P(Eff), Psi(Ele_mean)                       | -4.949  | -0.7378   | 0.2959  |              |               |             | 0.342          |              |                  | 0.0301 | 4  | -304.724 | 61.3      | 1.85  | 0.119  |
| P(Eff), Psi(Water_mean)                     | -4.996  | -0.7560   | 0.2998  |              |               |             |                |              | 0.219            | 0.0282 | 4  | -305.002 | 61.4      | 1.90  | 0.116  |
| P(Eff), Psi(Dbound)                         | -4.981  | -0.7436   | 0.2985  | -0.1719      |               |             |                |              |                  | 0.0268 | 4  | -305.216 | 61.4      | 1.93  | 0.114  |
| P(Eff), Psi(Dwway)                          | -4.949  | -0.7456   | 0.2959  |              |               | 0.0978      |                |              |                  | 0.0249 | 4  | -305.487 | 61.5      | 1.98  | 0.111  |
| Leopard cat                                 |         |           |         |              |               |             |                |              |                  |        |    |          |           |       |        |
| P(Eff)                                      | -2.549  | -0.7448   | 0.1442  |              |               |             |                |              |                  | 0.0178 | 3  | -510.979 | 117.3     | 0.00  | 0.260  |
| P(Eff), Psi(Tree90)                         | -2.495  | -0.8330   | 0.1405  |              |               |             |                | 0.5293       |                  | 0.0571 | 4  | -505.090 | 118.0     | 0.74  | 0.180  |
| P(Eff), Psi(Disturb)                        | -2.488  | -0.7878   | 0.1390  |              | 0.4166        |             |                |              |                  | 0.0492 | 4  | -506.296 | 118.3     | 1.00  | 0.158  |
| P(Eff), Psi(Water_mean)                     | -2.580  | -0.7378   | 0.1466  |              |               |             |                |              | 0.2464           | 0.0267 | 4  | -509.656 | 119.0     | 1.72  | 0.110  |
| P(Eff), Psi(Dbound)                         | -2.534  | -0.7560   | 0.1429  | 0.1011       |               |             |                |              |                  | 0.0193 | 4  | -510.748 | 119.3     | 1.95  | 0.098  |
| P(Eff), Psi(Ele_mean)                       | -2.555  | -0.7436   | 0.1447  |              |               |             | 0.0865         |              |                  | 0.0185 | 4  | -510.867 | 119.3     | 1.98  | 0.097  |
| P(Eff), Psi(Dwway)                          | -2.548  | -0.7456   | 0.1440  |              |               | -0.0152     |                |              |                  | 0.0178 | 4  | -510.974 | 119.3     | 2.00  | 0.096  |

clouded leopard are ranked by AICc and Asiatic golden cat, marbled cat and leopard cat were ranked by QAIC.

**Table S4.** Naïve occupancy, detection probability and occupancy estimate of tiger, clouded leopard, golden cat and marbled cat and beta estimates for effect of covariates from top models with standard errors under maximum likelihood framework selected based on AICc and QAIC.

| Species            | Naïve Occupancy | Detection Probability | Probability of Space use | Model Averaged Beta Parameters |                     |                      |                     |                      |                      |
|--------------------|-----------------|-----------------------|--------------------------|--------------------------------|---------------------|----------------------|---------------------|----------------------|----------------------|
|                    |                 |                       |                          | Elevation                      | Water density       | Tree cover           | Disturbance         | Boundary             | Distance to water    |
| Tiger              | 0.108           | 0.072<br>(SE±0.018)   | 0.226<br>(SE±0.076)      | 1.137<br>(SE±0.485)            | -                   | -0.423<br>(SE±0.454) | 1.801<br>(SE±0.919) | 0.325<br>(SE±0.401)  | -                    |
| Clouded leopard    | 0.34            | 0.129<br>(SE±0.015)   | 0.56<br>(SE±0.12)        | 0.082<br>(SE±0.302)            | 0.033<br>(SE±0.112) | 0.029<br>(SE±0.111)  | 2.632<br>(SE±1.437) | -0.075<br>(SE±0.199) | -0.147<br>(SE±0.199) |
| Asiatic golden cat | 0.278           | 0.143<br>(SE±0.016)   | 0.425<br>(SE±0.09)       | 0.108<br>(SE±0.347)            | 0.002<br>(SE±0.055) | 0.104<br>(SE±0.244)  | 1.277<br>(SE±0.909) | 0.031<br>(SE±0.109)  | 0.034<br>(SE±0.115)  |
| Marbled cat        | 0.181           | 0.11<br>(SE±0.02)     | 0.32<br>(SE±0.11)        | 0.040<br>(SE±0.153)            | 0.025<br>(SE±0.098) | 0.036<br>(SE±0.119)  | 0.029<br>(SE±0.099) | -0.019<br>(SE±0.085) | 0.011<br>(SE±0.073)  |
| Leopard cat        | 0.26            | 0.24<br>(SE±0.02)     | 0.31<br>(SE±0.077)       | 0.008<br>(SE±0.064)            | 0.027<br>(SE±0.092) | 0.095<br>(SE±0.214)  | 0.065<br>(SE±0.164) | 0.01<br>(SE±0.055)   | -0.001<br>(SE±0.047) |

**Table S5.** Models with 300,000 iterations and 50,000 burn-ins with thinning rate of 5 for two-species single-season occupancy modeling with effects of covariates to each species (Where cl= clouded leopard, gc= Asiatic golden cat, mc=marbled cat, lc=leopard cat, Dbound=Distance to boundary, Disturb=Disturbance, Dwway=Distance to accessible main streams, Ele=Mean elevation, Water=Density of streams, effort=Effort, tree=Tree cover)

| Parameters          | mu.vect  | sd.vect | 2.50%    | 25%      | 50%      | 75%      | 97.50%   | Rhat  | n.eff  |
|---------------------|----------|---------|----------|----------|----------|----------|----------|-------|--------|
| alpha.p.cl          | -2.018   | 0.162   | -2.371   | -2.115   | -2.011   | -1.91    | -1.722   | 1.002 | 4300   |
| alpha.p.gc          | -2.017   | 0.156   | -2.331   | -2.121   | -2.014   | -1.911   | -1.717   | 1.001 | 61000  |
| alpha.p.lc          | -1.289   | 0.145   | -1.576   | -1.387   | -1.288   | -1.191   | -1.009   | 1.001 | 36000  |
| alpha.p.mc          | -2.581   | 0.344   | -3.21    | -2.843   | -2.571   | -2.334   | -1.925   | 1.004 | 940    |
| alpha.p.tg          | -2.679   | 0.272   | -3.246   | -2.849   | -2.668   | -2.496   | -2.178   | 1.001 | 43000  |
| alpha.psi.cl        | 1.336    | 1.215   | -0.26    | 0.598    | 1.132    | 1.815    | 3.81     | 1.009 | 1900   |
| alpha.psi.gc        | -0.245   | 0.738   | -1.547   | -0.728   | -0.301   | 0.169    | 1.426    | 1.001 | 13000  |
| alpha.psi.lc        | -3.371   | 0.706   | -4.865   | -3.817   | -3.333   | -2.885   | -2.095   | 1.001 | 13000  |
| alpha.psi.mc        | 2.185    | 3.155   | -1.867   | -0.111   | 1.353    | 3.668    | 9.517    | 1.005 | 650    |
| alpha.psi.tg        | -0.532   | 0.79    | -1.851   | -1.073   | -0.601   | -0.077   | 1.167    | 1.001 | 6900   |
| beta.Dbound.psi.cl  | -0.145   | 0.386   | -0.863   | -0.317   | -0.116   | 0.072    | 0.457    | 1.008 | 2100   |
| beta.Dbound.psi.gc  | 0.326    | 0.271   | -0.199   | 0.145    | 0.324    | 0.505    | 0.867    | 1.001 | 64000  |
| beta.Dbound.psi.lc  | 0.042    | 0.242   | -0.441   | -0.118   | 0.045    | 0.205    | 0.512    | 1.001 | 110000 |
| beta.Dbound.psi.mc  | -0.185   | 0.928   | -2.756   | -0.381   | -0.05    | 0.24     | 1.156    | 1.008 | 1200   |
| beta.Dbound.psi.tg  | 0.774    | 0.479   | -0.025   | 0.478    | 0.749    | 1.034    | 1.663    | 1.004 | 10000  |
| beta.Disturb.psi.cl | 3.32     | 2.321   | -0.149   | 1.627    | 2.943    | 4.67     | 8.862    | 1.001 | 22000  |
| beta.Disturb.psi.gc | 2.377    | 1.479   | 0.52     | 1.371    | 2.039    | 2.985    | 6.418    | 1.001 | 18000  |
| beta.Disturb.psi.lc | -0.404   | 0.239   | -0.878   | -0.56    | -0.401   | -0.244   | 0.055    | 1.001 | 14000  |
| beta.Disturb.psi.mc | 4.299    | 2.926   | -0.327   | 2.031    | 4.325    | 6.566    | 9.555    | 1.002 | 3900   |
| beta.Disturb.psi.tg | 4.576    | 1.894   | 1.66     | 3.127    | 4.312    | 5.765    | 8.936    | 1.001 | 9500   |
| beta.Dwway.psi.cl   | -0.216   | 0.493   | -0.845   | -0.42    | -0.241   | -0.065   | 0.382    | 1.026 | 1400   |
| beta.Dwway.psi.gc   | 0.404    | 0.249   | -0.061   | 0.236    | 0.396    | 0.564    | 0.92     | 1.001 | 120000 |
| beta.Dwway.psi.lc   | -0.01    | 0.256   | -0.509   | -0.181   | -0.011   | 0.159    | 0.499    | 1.001 | 38000  |
| beta.Dwway.psi.mc   | -0.282   | 1.012   | -2.347   | -0.664   | -0.211   | 0.105    | 1.816    | 1.009 | 46000  |
| beta.Ele.psi.cl     | 0.49     | 0.894   | -0.877   | -0.069   | 0.417    | 1.005    | 2.252    | 1.002 | 2800   |
| beta.Ele.psi.gc     | 1.187    | 0.719   | -0.225   | 0.721    | 1.189    | 1.645    | 2.633    | 1.001 | 34000  |
| beta.Ele.psi.lc     | -0.538   | 0.381   | -1.309   | -0.781   | -0.53    | -0.291   | 0.2      | 1.001 | 44000  |
| beta.Ele.psi.mc     | 1.671    | 1.845   | -0.327   | 0.461    | 1.125    | 2.32     | 6.982    | 1.004 | 930    |
| beta.Ele.psi.tg     | 1.831    | 0.674   | 0.738    | 1.349    | 1.763    | 2.233    | 3.307    | 1.001 | 15000  |
| beta.Water.psi.cl   | 0.215    | 0.338   | -0.335   | 0.012    | 0.192    | 0.379    | 0.868    | 1.007 | 2400   |
| beta.Water.psi.gc   | 0.323    | 0.25    | -0.154   | 0.155    | 0.318    | 0.486    | 0.831    | 1.001 | 98000  |
| beta.Water.psi.lc   | 0.25     | 0.233   | -0.204   | 0.093    | 0.248    | 0.405    | 0.712    | 1.001 | 140000 |
| beta.Water.psi.mc   | 0.469    | 0.856   | -0.659   | 0.049    | 0.326    | 0.672    | 2.762    | 1.007 | 1600   |
| beta.effort.p.cl    | 0.091    | 0.13    | -0.16    | 0.002    | 0.089    | 0.177    | 0.351    | 1.001 | 11000  |
| beta.effort.p.gc    | 0.319    | 0.145   | 0.042    | 0.22     | 0.317    | 0.415    | 0.611    | 1.001 | 53000  |
| beta.effort.p.lc    | 0.234    | 0.145   | -0.049   | 0.136    | 0.234    | 0.332    | 0.52     | 1.001 | 62000  |
| beta.effort.p.mc    | -0.229   | 0.164   | -0.537   | -0.341   | -0.235   | -0.123   | 0.11     | 1.001 | 11000  |
| beta.effort.p.tg    | -0.219   | 0.205   | -0.611   | -0.359   | -0.222   | -0.083   | 0.191    | 1.001 | 140000 |
| beta.psi.WithCL.gc  | 0.672    | 0.608   | -0.492   | 0.268    | 0.662    | 1.064    | 1.91     | 1.001 | 19000  |
| beta.psi.WithCL.lc  | 0.934    | 0.577   | -0.173   | 0.548    | 0.925    | 1.309    | 2.094    | 1.001 | 37000  |
| beta.psi.WithCL.mc  | 0.458    | 0.801   | -1.224   | -0.049   | 0.493    | 0.996    | 1.959    | 1.001 | 6300   |
| beta.psi.WithGC.lc  | 1.543    | 0.522   | 0.541    | 1.189    | 1.536    | 1.888    | 2.59     | 1.001 | 24000  |
| beta.psi.WithGC.mc  | -0.136   | 0.717   | -1.537   | -0.607   | -0.142   | 0.327    | 1.309    | 1.001 | 23000  |
| beta.psi.WithMC.lc  | 1.257    | 0.679   | -0.131   | 0.823    | 1.269    | 1.707    | 2.562    | 1.002 | 3700   |
| beta.psi.WithTG.cl  | 0.789    | 0.738   | -0.644   | 0.291    | 0.784    | 1.282    | 2.261    | 1.001 | 200000 |
| beta.psi.WithTG.gc  | 0.941    | 0.688   | -0.392   | 0.477    | 0.934    | 1.398    | 2.315    | 1.001 | 120000 |
| beta.psi.WithTG.lc  | 1.228    | 0.642   | -0.024   | 0.794    | 1.223    | 1.658    | 2.496    | 1.001 | 88000  |
| beta.psi.WithTG.mc  | 0.156    | 0.806   | -1.437   | -0.385   | 0.16     | 0.701    | 1.724    | 1.001 | 12000  |
| beta.tree.psi.cl    | 0.123    | 0.466   | -0.691   | -0.09    | 0.145    | 0.378    | 0.876    | 1.01  | 1700   |
| beta.tree.psi.gc    | -0.144   | 0.313   | -0.753   | -0.353   | -0.146   | 0.063    | 0.48     | 1.001 | 60000  |
| beta.tree.psi.lc    | 0.401    | 0.273   | -0.14    | 0.22     | 0.402    | 0.582    | 0.939    | 1.001 | 23000  |
| beta.tree.psi.mc    | 1.022    | 1.612   | -0.679   | 0.244    | 0.601    | 1.397    | 5.33     | 1.007 | 1000   |
| beta.tree.psi.tg    | -0.961   | 0.606   | -2.111   | -1.252   | -0.906   | -0.594   | -0.056   | 1.004 | 31000  |
| deviance            | 3344.859 | 62.417  | 3226.059 | 3300.902 | 3344.064 | 3387.972 | 3467.087 | 1.003 | 1100   |

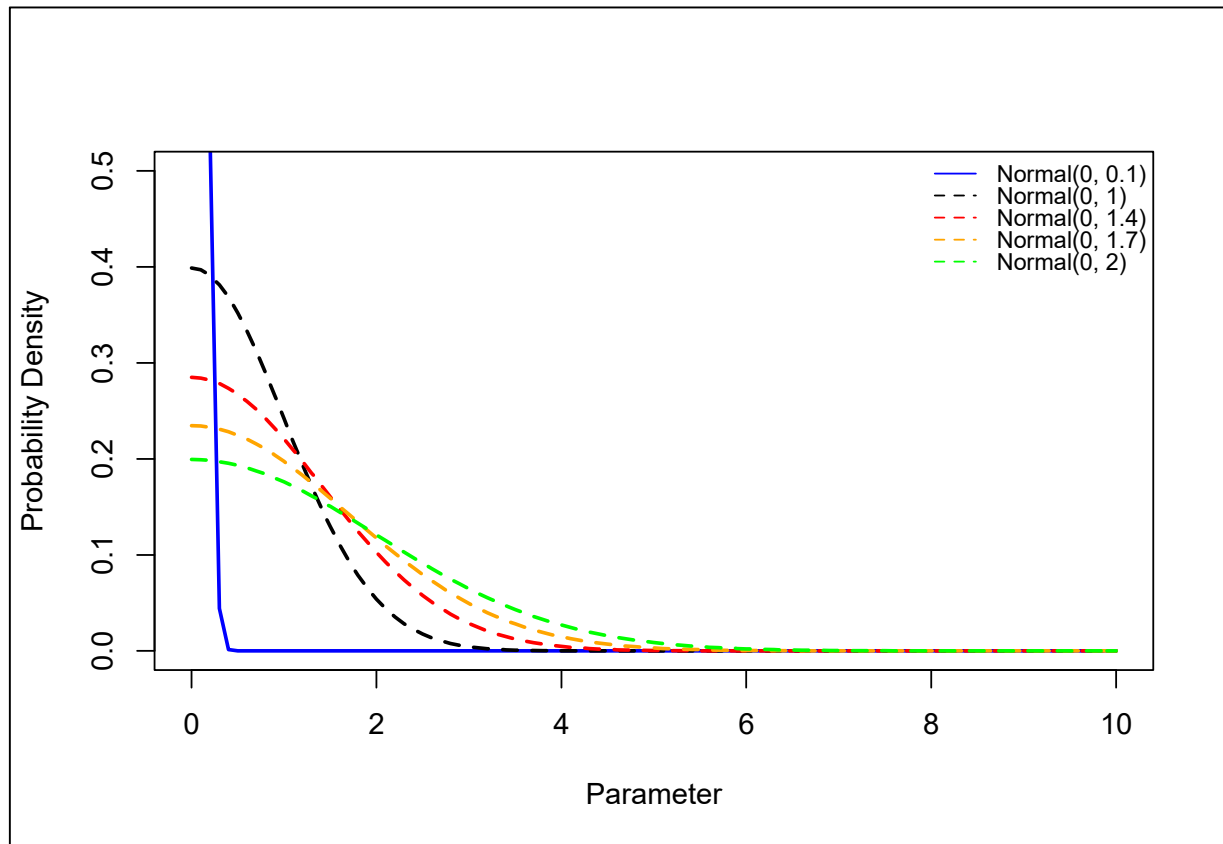

**Figure S2.** Sensitivity testing of priors using different standard deviation (SD) values for two-species single-season occupancy modeling



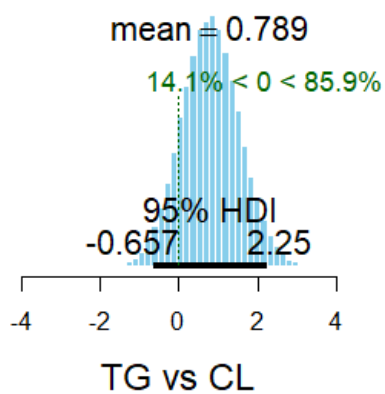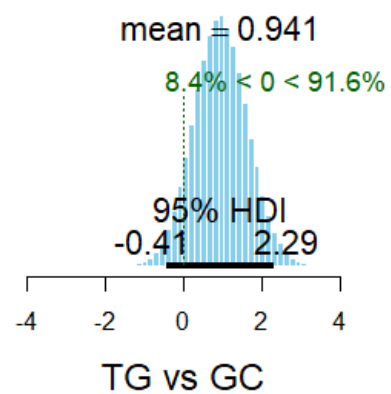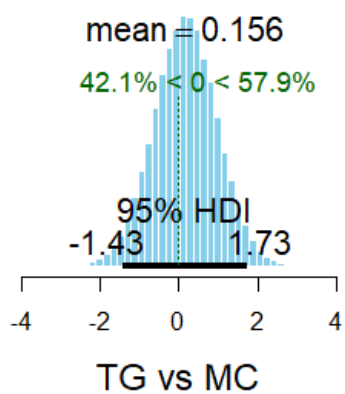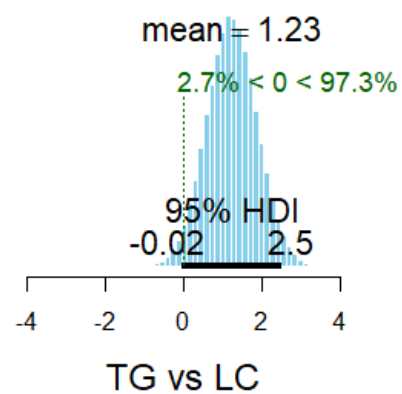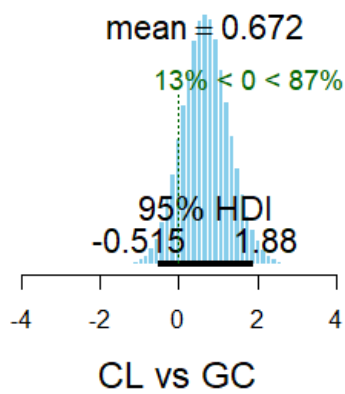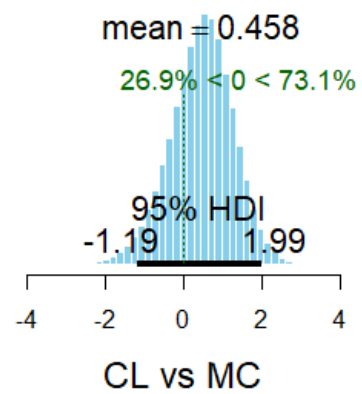

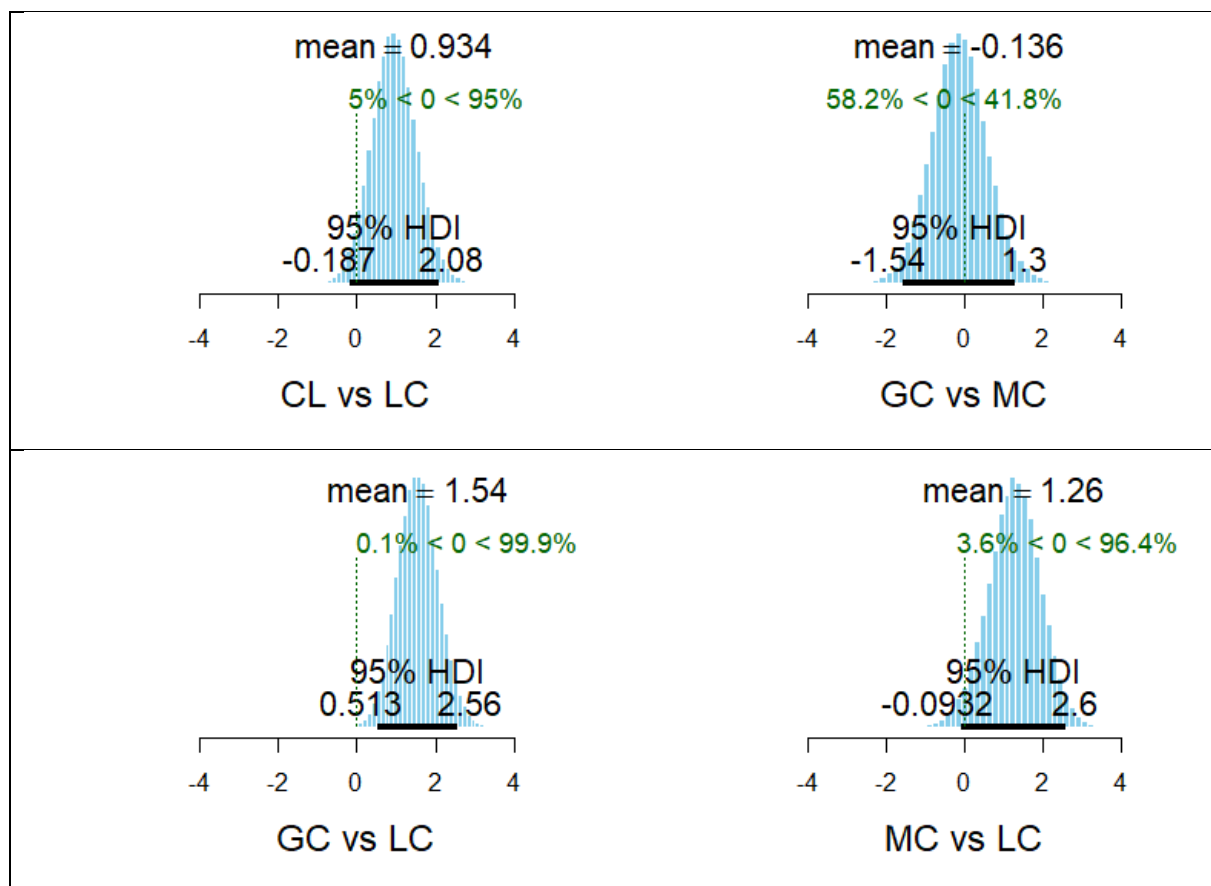

**Figure S3.** Overlap in two species occupancy modeling with the 95% credible density interval of the mean of posterior distribution of parameter estimates where TG=Tiger, CL= Clouded leopard, GC=Asiatic golden cat, MC=Marbled cat, LC=Leopard cat

**Table S6.** Comparison of Bootstrapped means for smoothing using different bandwidth values (c=1, c=0.1 and c=0.5) to check sensitivity of smoothing effect derived for both sample sizes (n=1344 and n=823) for activity pattern overlap. Overall dataset (n=1344) and default value (c=1) is used for final interpretation. (where Tg=Tiger, Cl=Clouded leopard, Mc=Marbled cat, Gc=Asiatic golden cat, Lc=Leopard cat)

| Species-pair | Mean Overlap & 95% CI comparison (n=1344) |                        |                        | Mean Overlap & 95% CI comparison (n=823) |                        |                         |
|--------------|-------------------------------------------|------------------------|------------------------|------------------------------------------|------------------------|-------------------------|
|              | 1 (default)                               | 0.1                    | 0.5                    | 1 (default)                              | 0.1                    | 0.5                     |
| TgCl         | 0.564<br>(0.447-0.633)                    | 0.564<br>(0.446-0.631) | 0.564<br>(0.449-0.631) | 0.624<br>(0.485-0.716)                   | 0.624<br>(0.485-0.719) | 0.624<br>(0.486-0.715)  |
| TgMc         | 0.847<br>(0.808-0.974)                    | 0.847<br>(0.807-0.974) | 0.848<br>(0.806-0.974) | 0.821<br>(0.769-0.968)                   | 0.820<br>(0.772-0.967) | 0.819<br>(0.769-0.967)  |
| TgGc         | 0.692<br>(0.593-0.762)                    | 0.691<br>(0.593-0.761) | 0.692<br>(0.595-0.759) | 0.691<br>(0.573-0.785)                   | 0.691<br>(0.572-0.789) | 0.691<br>(0.574-0.788)  |
| TgLc         | 0.402<br>(0.275-0.446)                    | 0.402<br>(0.279-0.448) | 0.402<br>(0.277-0.449) | 0.407<br>(0.2570-0.476)                  | 0.407<br>(0.257-0.477) | 0.407<br>(0.257-0.477)  |
| ClMc         | 0.511<br>(0.412-0.557)                    | 0.511<br>(0.412-0.556) | 0.511<br>(0.413-0.558) | 0.549<br>(0.441-0.613)                   | 0.549<br>(0.440-0.614) | 0.550<br>(0.441-0.612)  |
| ClGc         | 0.805<br>(0.724-0.853)                    | 0.805<br>(0.723-0.854) | 0.805<br>(0.723-0.854) | 0.833<br>(0.755-0.900)                   | 0.833<br>(0.755-0.900) | 0.833<br>(0.754-0.899)  |
| CLLc         | 0.794<br>(0.745-0.851)                    | 0.793<br>(0.745-0.850) | 0.794<br>(0.745-0.851) | 0.730<br>(0.656-0.793)                   | 0.730<br>(0.665-0.791) | 0.730<br>(0.657-0.792)  |
| McGc         | 0.631<br>(0.541-0.672)                    | 0.631<br>(0.538-0.672) | 0.631<br>(0.537-0.672) | 0.615<br>(0.512-0.674)                   | 0.614<br>(0.509-0.674) | 0.615<br>(0.5112-0.674) |
| McLc         | 0.338<br>(0.240-0.359)                    | 0.338<br>(0.239-0.359) | 0.337<br>(0.239-0.359) | 0.314<br>(0.205-0.349)                   | 0.314<br>(0.202-0.347) | 0.314<br>(0.202-0.347)  |
| GcLc         | 0.678<br>(0.609-0.719)                    | 0.678<br>(0.609-0.719) | 0.678<br>(0.607-0.719) | 0.658<br>(0.572-0.709)                   | 0.658<br>(0.571-0.709) | 0.657<br>(0.571-0.711)  |

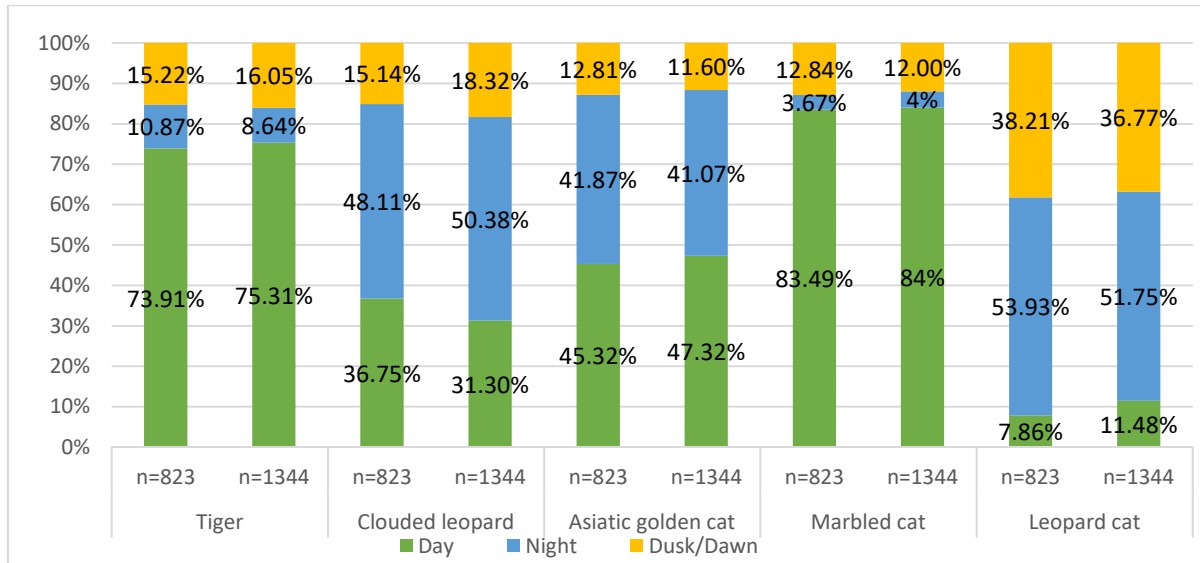

**Figure S4.** Diel activity of tiger, clouded leopard, Asiatic golden cat, marbled cat and leopard cat (n= 823 represent dataset used for space use and interaction, n=1344 represent combination of all camera trap data surveyed during 2014-2018)

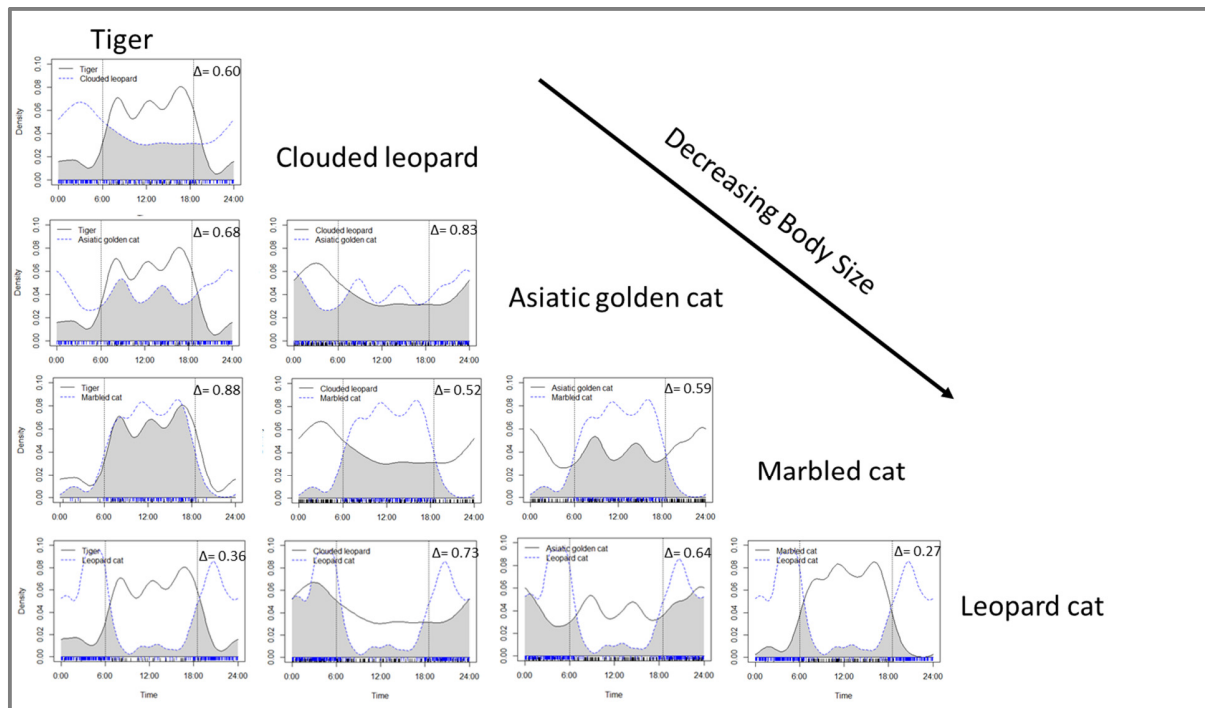

**Figure S5.** Activity overlap of tiger, clouded leopard, marbled cat and Asiatic golden cat from occupancy survey data (n=823). Dotted vertical lines at 06:00 and 18:00 hour represents the approximate dawn and dusk. Activities detected for each species are represented by blue and black coloured rugs on x axes.

**Table S7.** Observed temporal activity of tiger, clouded leopard, Asiatic golden cat, marbled cat and leopard cat in Htamanthi Wildlife Sanctuary and comparison to findings around Southeast Asia region

| Site                                    | Dial Activity                              | Source              |
|-----------------------------------------|--------------------------------------------|---------------------|
| <b>Tiger</b>                            |                                            |                     |
| <b>Htamanthi WS (Myanmar)</b>           | <b>73% to 75% Diurnal</b>                  | <b>This study</b>   |
| Sundarban (Bangladesh)                  | Nocturnal and Crepuscular                  | [10]                |
| Thailand                                | 57% Diurnal                                | [11]                |
| Jerangau (Peninsular Malaysia)          | 37% Diurnal                                | [12]                |
| Kerinci-Seblat(Sumatra)                 | 62% Diurnal                                | [13]                |
| <b>Clouded leopard</b>                  |                                            |                     |
| <b>Htamanthi WS (Myanmar)</b>           | <b>31% to 37% Diurnal</b>                  | <b>This study</b>   |
| Dampha (India)                          | 40% Diurnal                                | [14]                |
| Thailand                                | 27% Diurnal                                | [11]                |
| Jerangau (Peninsular Malaysia)          | 25% Diurnal                                | [12]                |
| Kerinci-Seblat(Sumatra)                 | 36.1% Diurnal                              | [15]                |
| Sabah (Borneo)                          | 23.9% (male) and 26.3% (female)<br>Diurnal | [16]                |
| Sebangau (Borneo)                       | 24% Diurnal                                | [17]                |
| <b>Asiatic golden cat</b>               |                                            |                     |
| <b>Htamanthi WS (Myanmar)</b>           | <b>45% to 47% Diurnal</b>                  | <b>This study</b>   |
| Dampha (India)                          | 67% Diurnal                                | [14]                |
| Thailand                                | 58% Diurnal                                | [11]                |
| Jerangau (Peninsular Malaysia)          | 62% Diurnal                                | [12]                |
| Kerinci-Seblat(Sumatra)                 | 62% Diurnal                                | [15]                |
| <b>Marbled cat</b>                      |                                            |                     |
| <b>Htamanthi WS (Myanmar)</b>           | <b>83% to 84% Diurnal</b>                  | <b>This study</b>   |
| Dampha (India)                          | 83.4% Diurnal                              | [14]                |
| Thailand                                | 100% Diurnal                               | [11]                |
| Johor (Peninsular Malaysia)             | 82% Diurnal                                | [18]                |
| Sabah (Borneo)                          | 62% Diurnal                                | [16]                |
| Sebangau (Borneo)                       | 50% Diurnal                                | [17]                |
| <b>Leopard cat</b>                      |                                            |                     |
| <b>Htamanthi WS (Myanmar)</b>           | <b>7% to 11% Diurnal</b>                   | <b>This study</b>   |
| Sabangau peat-swamp (Indonesian Borneo) | 65% Nocturnal                              | [17]                |
| Thailand                                | 85% Nocturnal                              | Lynam et al., 2013) |
| Jerangau (Peninsular Malaysia)          | 77% Nocturnal                              | [12]                |

*Note: The activity patterns were compiled in the table as diurnal (except leopard cat) regarding the crepuscular activities as part of nocturnal activity. Please refer to original source for detail*

**Table S8.** Model metrics for Mantel test evaluating the support for each hypothesis where h= hypothesis, size = difference in body size, space = spatial overlap between a pair of species, time = temporal overlap between a pair of species, both = spatio-temporal overlap index

| <b>h1</b>                 | <b>Tiger</b> | <b>Clouded leopard</b> | <b>Asiatic golden cat</b> | <b>Marbled cat</b> | <b>leopard</b> |
|---------------------------|--------------|------------------------|---------------------------|--------------------|----------------|
| <b>Tiger</b>              | 0            | -10                    | -8                        | -6                 | 0              |
| <b>Clouded leopard</b>    | -10          | 0                      | 0                         | 0                  | 0              |
| <b>Asiatic golden cat</b> | -8           | 0                      | 0                         | 0                  | 0              |
| <b>Marbled cat</b>        | -6           | 0                      | 0                         | 0                  | 0              |
| <b>Leopard cat</b>        | 0            | 0                      | 0                         | 0                  | 0              |
|                           |              |                        |                           |                    |                |
| <b>h2</b>                 | <b>Tiger</b> | <b>Clouded leopard</b> | <b>Asiatic golden cat</b> | <b>Marbled cat</b> | <b>leopard</b> |
| <b>Tiger</b>              | 0            | -10                    | 10                        | 10                 | 0              |
| <b>Clouded leopard</b>    | -10          | 0                      | 0                         | 0                  | 0              |
| <b>Asiatic golden cat</b> | 10           | 0                      | 0                         | 0                  | 0              |
| <b>Marbled cat</b>        | 10           | 0                      | 0                         | 0                  | 0              |
| <b>Leopard cat</b>        | 0            | 0                      | 0                         | 0                  | 0              |
|                           |              |                        |                           |                    |                |
| <b>h3</b>                 | <b>Tiger</b> | <b>Clouded leopard</b> | <b>Asiatic golden cat</b> | <b>Marbled cat</b> | <b>leopard</b> |
| <b>Tiger</b>              | 0            | 0                      | 0                         | 0                  | 0              |
| <b>Clouded leopard</b>    | 0            | 0                      | -10                       | -5                 | 0              |
| <b>Asiatic golden cat</b> | 0            | -10                    | 0                         | 0                  | 0              |
| <b>Marbled cat</b>        | 0            | -5                     | 0                         | 0                  | 0              |
| <b>Leopard cat</b>        | 0            | 0                      | 0                         | 0                  | 0              |
|                           |              |                        |                           |                    |                |

| <b>h4</b>                 | Tiger | Clouded leopard | Asiatic golden cat | Marbled cat | leopard |
|---------------------------|-------|-----------------|--------------------|-------------|---------|
| <b>Tiger</b>              | 0     | 0               | 0                  | 0           | 0       |
| <b>Clouded leopard</b>    | 0     | 0               | 0                  | -10         | 0       |
| <b>Asiatic golden cat</b> | 0     | 0               | 0                  | 0           | 0       |
| <b>Marbled cat</b>        | 0     | -10             | 0                  | 0           | 0       |
| <b>Leopard cat</b>        | 0     | 0               | 0                  | 0           | 0       |
|                           |       |                 |                    |             |         |
| <b>h5</b>                 | Tiger | Clouded leopard | Asiatic golden cat | Marbled cat | leopard |
| <b>Tiger</b>              | 0     | 0               | 0                  | 0           | 0       |
| <b>Clouded leopard</b>    | 0     | 0               | 0                  | 0           | 0       |
| <b>Asiatic golden cat</b> | 0     | 0               | 0                  | -10         | 0       |
| <b>Marbled cat</b>        | 0     | 0               | -10                | 0           | 0       |
| <b>Leopard cat</b>        | 0     | 0               | 0                  | 0           | 0       |
|                           |       |                 |                    |             |         |
| <b>size</b>               | Tiger | Clouded leopard | Asiatic golden cat | Marbled cat | leopard |
| <b>Tiger</b>              | 0     | -4              | -3                 | -2          | -1      |
| <b>Clouded leopard</b>    | -4    | 0               | -4                 | -3          | -2      |
| <b>Asiatic golden cat</b> | -3    | -4              | 0                  | -4          | -3      |
| <b>Marbled cat</b>        | -2    | -3              | -4                 | 0           | -4      |
| <b>Leopard cat</b>        | -1    | -2              | -3                 | -4          | 0       |
|                           |       |                 |                    |             |         |
| <b>Space</b>              | Tiger | Clouded leopard | Asiatic golden cat | Marbled cat | leopard |
| <b>Tiger</b>              | 0     | 0.86            | 0.92               | 0.58        | 0.97    |

|                           |       |                 |                    |             |         |
|---------------------------|-------|-----------------|--------------------|-------------|---------|
| <b>Clouded leopard</b>    | 0.86  | 0               | 0.87               | 0.73        | 0.95    |
| <b>Asiatic golden cat</b> | 0.92  | 0.87            | 0                  | 0.42        | 1       |
| <b>Marbled cat</b>        | 0.58  | 0.73            | 0.42               | 0           | 0.96    |
| <b>Leopard cat</b>        | 0.97  | 0.95            | 1                  | 0.96        | 0       |
|                           |       |                 |                    |             |         |
| <b>Time</b>               | Tiger | Clouded leopard | Asiatic golden cat | Marbled cat | leopard |
| <b>Tiger</b>              | 0     | 0.54            | 0.068              | 0.89        | 0.36    |
| <b>Clouded leopard</b>    | 0.54  | 0               | 0.79               | 0.48        | 0.8     |
| <b>Asiatic golden cat</b> | 0.068 | 0.79            | 0                  | 0.6         | 0.66    |
| <b>Marbled cat</b>        | 0.89  | 0.48            | 0.6                | 0           | 0.29    |
| <b>Leopard cat</b>        | 0.36  | 0.8             | 0.66               | 0.29        | 0       |
|                           |       |                 |                    |             |         |
| <b>Both</b>               | Tiger | Clouded leopard | Asiatic golden cat | Marbled cat | leopard |
| <b>Tiger</b>              | 0     | 0.46            | 0.63               | 0.52        | 0.35    |
| <b>Clouded leopard</b>    | 0.46  | 0               | 0.69               | 0.35        | 0.76    |
| <b>Asiatic golden cat</b> | 0.63  | 0.69            | 0                  | 0.25        | 0.66    |
| <b>Marbled cat</b>        | 0.52  | 0.35            | 0.25               | 0           | 0.28    |
| <b>Leopard cat</b>        | 0.35  | 0.76            | 0.66               | 0.28        | 0       |



**Table S9.** Ranking supports for joint niche separation hypotheses across spatial, temporal and combined dimensions. Hypotheses are ranked in order of Mantel correlation between niche overlap and the model matrix for each hypothesis. Space – hypotheses tested for spatial partitioning; Time – hypotheses tested for temporal partitioning, Both – hypotheses tested for the joint portioning of Space\*Time

|         | Space |         | Time   |         | Both  |
|---------|-------|---------|--------|---------|-------|
| h6      | 0.744 | h521    | 0.250  | h56     | 0.559 |
| h61     | 0.701 | h52     | 0.243  | h561    | 0.553 |
| h56     | 0.690 | h21     | 0.211  | h563    | 0.479 |
| h561    | 0.679 | h2      | 0.203  | h5631   | 0.471 |
| h562    | 0.654 | h5621   | 0.184  | h6      | 0.469 |
| h5621   | 0.641 | h562    | 0.183  | h61     | 0.455 |
| h642    | 0.573 | h621    | 0.134  | h5632   | 0.401 |
| h62     | 0.569 | h62     | 0.128  | h63     | 0.399 |
| h5642   | 0.569 | h51     | 0.113  | h65132  | 0.396 |
| h621    | 0.560 | h5      | 0.093  | h631    | 0.393 |
| h64     | 0.559 | h5321   | 0.082  | h5621   | 0.385 |
| h65412  | 0.551 | h1      | 0.078  | h562    | 0.381 |
| h6421   | 0.540 | h532    | 0.075  | h5643   | 0.326 |
| h641    | 0.532 | h65132  | 0.049  | h65431  | 0.326 |
| h564    | 0.506 | h5421   | 0.047  | h51     | 0.317 |
| h5641   | 0.502 | h321    | 0.046  | h531    | 0.316 |
| h65132  | 0.281 | h5632   | 0.042  | h53     | 0.308 |
| h5632   | 0.274 | h32     | 0.037  | h6321   | 0.298 |
| h654321 | 0.259 | h542    | 0.035  | h632    | 0.297 |
| h5631   | 0.259 | h561    | 0.033  | h5641   | 0.287 |
| h65432  | 0.253 | h56     | 0.016  | h564    | 0.279 |
| h563    | 0.248 | h6321   | 0.013  | h5      | 0.277 |
| h51     | 0.229 | h65412  | 0.009  | h654321 | 0.277 |
| h65431  | 0.226 | h632    | 0.003  | h65432  | 0.276 |
| h6321   | 0.220 | h421    | -0.003 | h6413   | 0.259 |
| h5643   | 0.216 | h5642   | -0.005 | h643    | 0.257 |
| h61432  | 0.213 | h42     | -0.022 | h621    | 0.227 |
| h632    | 0.209 | h531    | -0.026 | h5321   | 0.224 |
| h521    | 0.208 | h15432  | -0.033 | h31     | 0.221 |
| h6432   | 0.205 | h61     | -0.039 | h532    | 0.213 |
| h631    | 0.205 | h53     | -0.040 | h62     | 0.210 |
| h1      | 0.198 | h5432   | -0.045 | h3      | 0.208 |
| h63     | 0.191 | h6421   | -0.046 | h65412  | 0.208 |
| h6413   | 0.186 | h5631   | -0.052 | h5642   | 0.196 |
| h5      | 0.176 | h654321 | -0.057 | h61432  | 0.194 |
| h643    | 0.174 | h563    | -0.067 | h641    | 0.190 |

|        |        |        |        |        |        |
|--------|--------|--------|--------|--------|--------|
| h52    | 0.172  | h642   | -0.071 | h6432  | 0.188  |
| h5421  | 0.169  | h6     | -0.072 | h64    | 0.174  |
| h542   | 0.143  | h65432 | -0.072 | h5431  | 0.173  |
| h541   | 0.138  | h4321  | -0.074 | h1     | 0.172  |
| h54    | 0.107  | h31    | -0.078 | h543   | 0.161  |
| h21    | 0.102  | h432   | -0.092 | h321   | 0.116  |
| h421   | 0.094  | h541   | -0.092 | h15432 | 0.112  |
| h41    | 0.060  | h631   | -0.098 | h521   | 0.111  |
| h42    | 0.056  | h61432 | -0.099 | h32    | 0.097  |
| h2     | 0.056  | h3     | -0.099 | h5432  | 0.096  |
| h4     | 0.007  | h54    | -0.113 | h431   | 0.084  |
| h15432 | -0.008 | h63    | -0.118 | h52    | 0.076  |
| h5321  | -0.012 | h6432  | -0.119 | h6421  | 0.075  |
| h5431  | -0.034 | h5641  | -0.120 | h43    | 0.064  |
| h5432  | -0.034 | h5431  | -0.126 | h541   | 0.056  |
| h532   | -0.042 | h543   | -0.143 | h642   | 0.046  |
| h531   | -0.044 | h65431 | -0.144 | h54    | 0.025  |
| h543   | -0.061 | h564   | -0.144 | h4321  | 0.011  |
| h53    | -0.078 | h5643  | -0.163 | h432   | -0.013 |
| h4321  | -0.081 | h431   | -0.187 | h5421  | -0.036 |
| h321   | -0.091 | h6413  | -0.198 | h542   | -0.070 |
| h431   | -0.114 | h41    | -0.214 | h21    | -0.083 |
| h432   | -0.116 | h43    | -0.214 | h2     | -0.134 |
| h32    | -0.128 | h641   | -0.215 | h41    | -0.146 |
| h31    | -0.141 | h643   | -0.226 | h4     | -0.220 |
| h43    | -0.154 | h64    | -0.266 | h421   | -0.225 |
| h3     | -0.190 | h4     | -0.268 | h42    | -0.290 |

## References

1. Hansen, M.C.; Potapov, P. V.; Moore, R.; Hancher, M.; Turubanova, S.A.; Tyukavina, A.; Thau, D.; Stehman, S.V.; Goeta, S.J.; Loveland, T.R.; et al. High-resolution global maps of 21st-century forest cover change. *Science* **2013**, *342*, 850–853, doi:10.1126/science.1244693.
2. QGIS Development Team QGIS Geographic Information System 2017.
3. Penjor, U.; Tan, C.K.W.; Wangdi, S.; Macdonald, D.W. Understanding the environmental and anthropogenic correlates of tiger presence in a montane conservation landscape. *Biol. Conserv.* **2019**, *238*, 108196, doi:10.1016/j.biocon.2019.108196.
4. MacKenzie, D.I.; Nichols, J.D.; Lachman, G.B.; Droege, S.; Royle, A.A.; Langtimm, C.A. Estimating site occupancy rates when detection probabilities are less than one. *Ecology* **2002**, *83*, 2248–2255, doi:10.1890/0012-9658(2002)083[2248:ESORWD]2.0.CO;2.
5. MacKenzie, D.I.; Bailey, L.L. Assessing the fit of site-occupancy models. *J. Agric. Biol. Environ. Stat.* **2004**, *9*, 300–318, doi:10.1198/108571104X3361.
6. Barton, K. MuMIn: Multi-model inference 2019.
7. Anderson, D.R. *Model based inference in the life sciences: a primer on evidence*; Springer Science & Business Media, 2007;
8. R Core Team R: A Language and Environment for Statistical Computing 2013.
9. Fiske, I.; Chandler, R. unmarked: An R package for fitting hierarchical models of wildlife occurrence and abundance. *J. Stat. Softw.* 2011, *43*, 1–23.
10. Naha, D.; Jhala, Y. V.; Qureshi, Q.; Roy, M.; Sankar, K.; Gopal, R. Ranging, activity and habitat use by tigers in the mangrove forests of the Sundarban. *PLoS One* **2016**, *11*, e0152119, doi:10.1371/journal.pone.0152119.
11. Lynam, A.J.; Jenks, K.E.; Steinmetz, R.; Reed, D.H. Terrestrial activity patterns of wild cats from camera-trapping. *Raffles Bull. Zool.* **2013**, *61*, 407–415.
12. Azlan, J.M.; Sharma, D.S.K. The diversity and activity patterns of wild felids in a secondary forest in Peninsular Malaysia. *Oryx* **2006**, *40*, 1–6, doi:10.1017/S0030605306000147.
13. Linkie, M.; Ridout, M. Assessing tiger-prey interactions in Sumatran rainforests. *J. Zool.* **2011**, *284*, 224–229, doi:10.1111/j.1469-7998.2011.00801.x.
14. Singh, P.; Macdonald, D.W. Populations and activity patterns of clouded leopards and marbled cats in Dampa Tiger Reserve, India. *J. Mammal.* **2017**, *98*, 1453–1462, doi:10.1093/jmammal/gyx104.
15. Haidir, I.A.; Macdonald, D.W.; Linkie, M. Assessing the spatiotemporal interactions of mesopredators in Sumatra's tropical rainforest. *PLoS One* **2018**, *13*, e0202876, doi:10.1371/journal.pone.0202876.
16. Hearn, A.J.; Cushman, S.A.; Ross, J.; Goossens, B.; Hunter, L.T.B.; Macdonald, D.W. Spatio-temporal ecology of sympatric felids on Borneo. Evidence for resource partitioning? *PLoS One* **2018**, *13*, e-0200828, doi:10.1371/journal.pone.0200828.
17. Cheyne, S.M.; MacDonald, D.W. Wild felid diversity and activity patterns in Sabangau peat-

swamp forest, Indonesian Borneo. *Oryx* **2011**, *45*, 119–124, doi:10.1017/S003060531000133X.

18. Gumal, M.; Salleh, A.B.B.M.; Yasak, M.N.; Horng, L.S.; Lee, B.P.Y.-H.; Pheng, L.C.; Hamzah, H.; Kong, D.; Magintan, D.; Yung, D.T.C.; et al. Small-medium wild cats of Endau Rompin landscape in Johor, Peninsular Malaysia. *Cat News, Spec. Issue* **2014**, 10–18.
